# Supplementary material
Source: PubMed Central journal article supplement (PMC2695048)
Supplement: 0900908106_0900908106SI.pdf [file 0900908106_0900908106SI.pdf]

# Supporting Information

Bajaj et al. 10.1073/pnas.0900908106

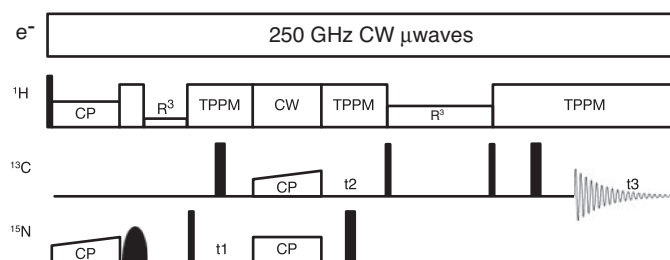

Fig. S1. Pulse sequence for DNP-enhanced multidimensional, band-selective heteronuclear  $^{13}\text{C}$ - $^{15}\text{N}$  correlation spectroscopy.

**Table S1. Chemical shifts (in ppm) of retinal carbons and K216-N $\zeta$  in photocycle intermediates of bR**

| Photostate        | bR <sub>568</sub> | bR <sub>555</sub> | bR <sub>555b</sub> | K     | Iso-bR | L <sub>166</sub> | L <sub>174</sub> | L <sub>181</sub> | L <sub>186</sub> | M <sub>0</sub> |
|-------------------|-------------------|-------------------|--------------------|-------|--------|------------------|------------------|------------------|------------------|----------------|
| <sup>13</sup> C11 | 135.3             | 138.5             | —                  | —     | —      | —                | —                | —                | —                | 130.0          |
| <sup>13</sup> C12 | 133.4             | 124.9             | —                  | 140.7 | —      | —                | 137.0            | 120.4            | 121.0            | 127.2, 125.9   |
| <sup>13</sup> C13 | 166.1/1.5         | —                 | —                  | —     | —      | —                | —                | —                | —                | —              |
| <sup>13</sup> C14 | 123.1             | 111.0             | —                  | 118.2 | —      | —                | 123.3            | 116.2            | 116.2            | 124.5          |
| <sup>13</sup> C15 | 160.0             | 163.2             | 164.7              | 160.2 | 156.3  | 163              | 162.9            | 162.5            | 162.7            | 165.4          |
| <sup>13</sup> C20 | 13.1              | 23.5              | —                  | —     | —      | 15.5             | —                | 24.0             | 24.5             | 21.5           |
| <sup>15</sup> N   | 165.2             | 171.1             | 173.8              | 157.2 | 164.2  | 166.0            | 173.8            | 181.2            | 186              | 317            |

Here the bR states are identified with subscripts indicating their wavelength of maximum visible absorption, and the L substates are identified with subscripts indicating the <sup>15</sup>N chemical shift of the Schiff base. The C15 and N $\zeta$  chemical shifts are derived from the spectra shown in Fig. 2, and the other chemical shifts are derived from the spectra shown in Fig. 3.

**Table S2. Chemical shifts (in ppm) of the lysine-216 carbons and N $\zeta$  in photocycle intermediates of bR**

| Photostate                 | bR <sub>568</sub> | bR <sub>555</sub> | K    | L <sub>174</sub> | L <sub>181</sub> | L <sub>186</sub> | M <sub>0</sub> |
|----------------------------|-------------------|-------------------|------|------------------|------------------|------------------|----------------|
| <sup>13</sup> C $\epsilon$ | 53.5              | 48.0              | 50.7 | 48.2             | 51.2,49.1        | 50.0             | 60.7           |
| <sup>13</sup> C $\delta$   | 29.5              | 30.6              | 28.0 | 32.2             | 29.5,28.2        | 29.0             | —              |
| <sup>13</sup> C $\gamma$   | 26.5              | 27.8              | 24.3 | —                | —                | 23.8             | —              |
| <sup>13</sup> C $\beta$    | 35.0              | —                 | —    | —                | —                | 33.0             | —              |
| <sup>13</sup> C $\alpha$   | 55.2              | —                 | —    | —                | —                | —                | —              |
| <sup>15</sup> N $\zeta$    | 165.2             | 172               | 156  | 172              | 181              | 186              | 317            |

Here the bR states are identified with subscripts indicating their wavelength of maximum visible absorption, and the L substates are identified with subscripts indicating the <sup>15</sup>N chemical shift of the Schiff base. These chemical shifts are derived from the spectra shown in Fig. 4.
